# Supplementary material
Source: publisher figshare collection journal article supplement (https://geolsoc.figshare.com/articles/dataset/_/3454049)
Supplement: Supplementary file 3 [file 1]

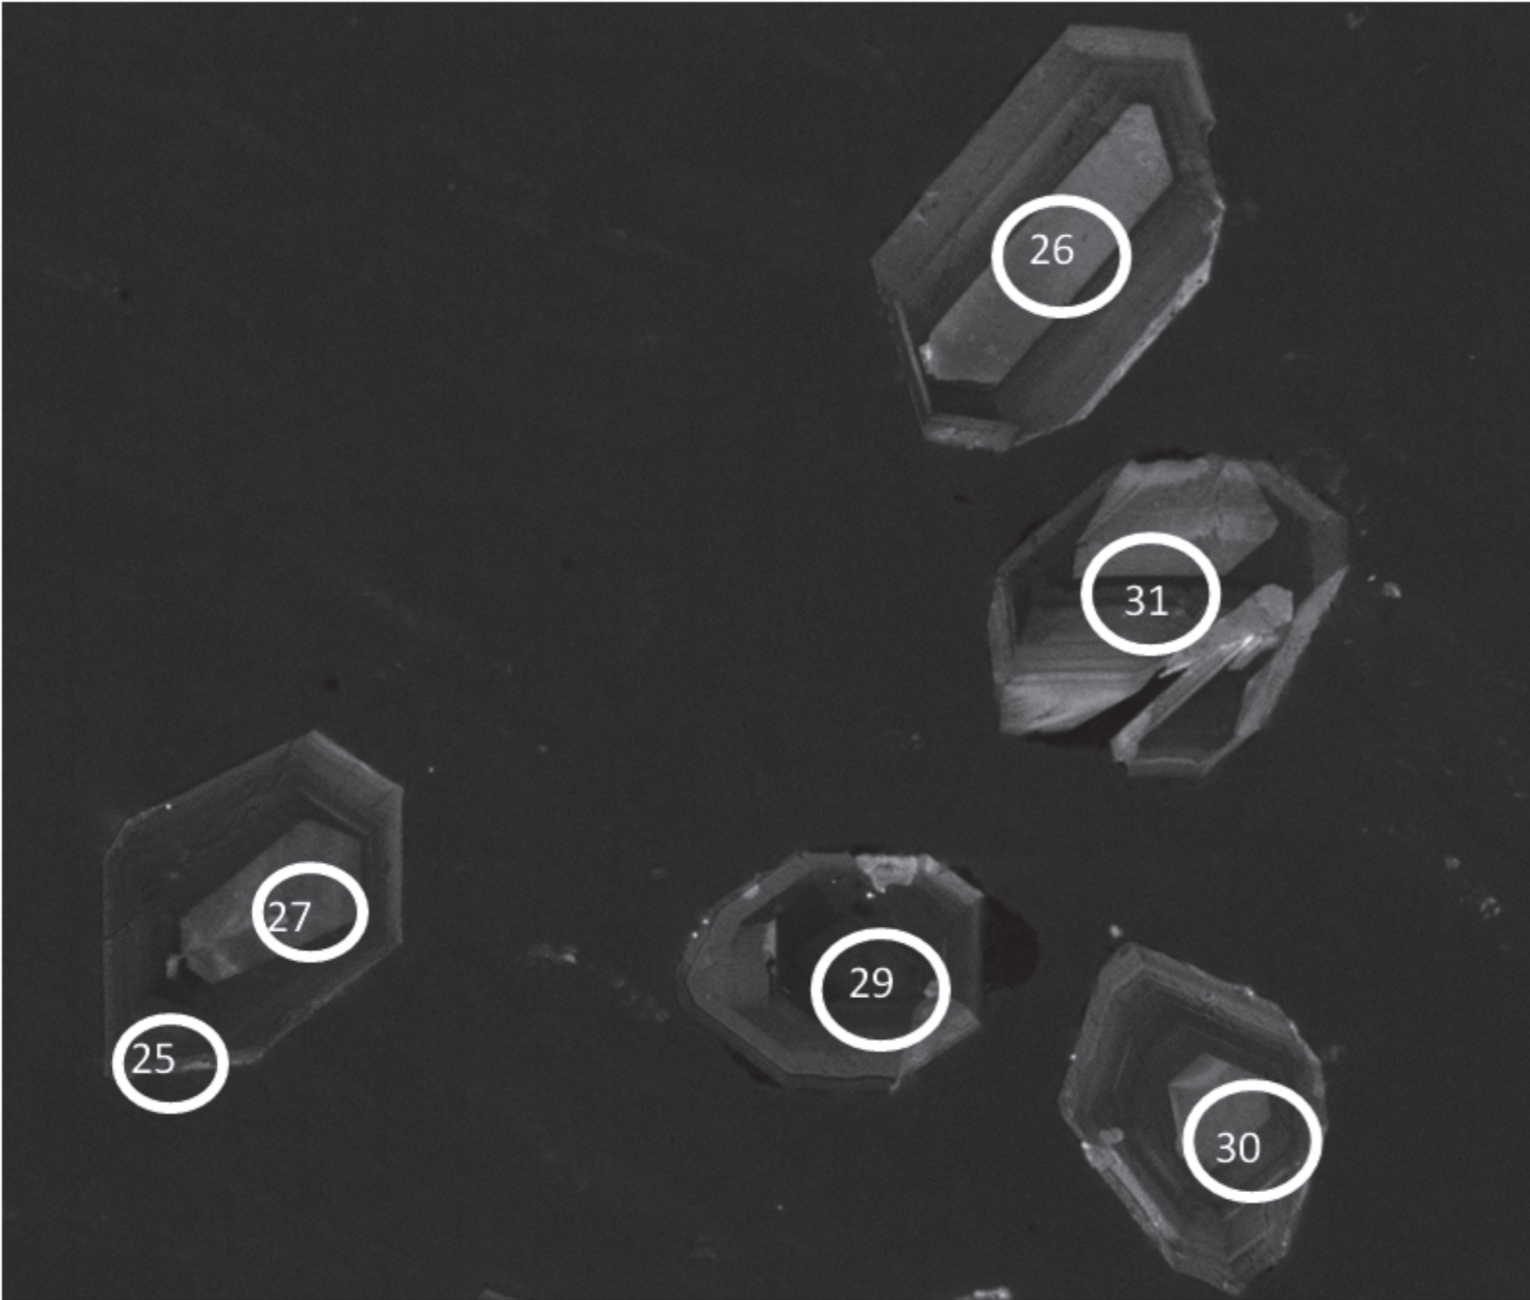

|                  |         |     |         |             |        |
|------------------|---------|-----|---------|-------------|--------|
| HV               | WD      | det | curr    | vac mode    | 200 μm |
| 10.00 kV         | 16.7 mm | PMD | 0.22 nA | High vacuum |        |
| McConnell 10-220 |         |     |         |             |        |

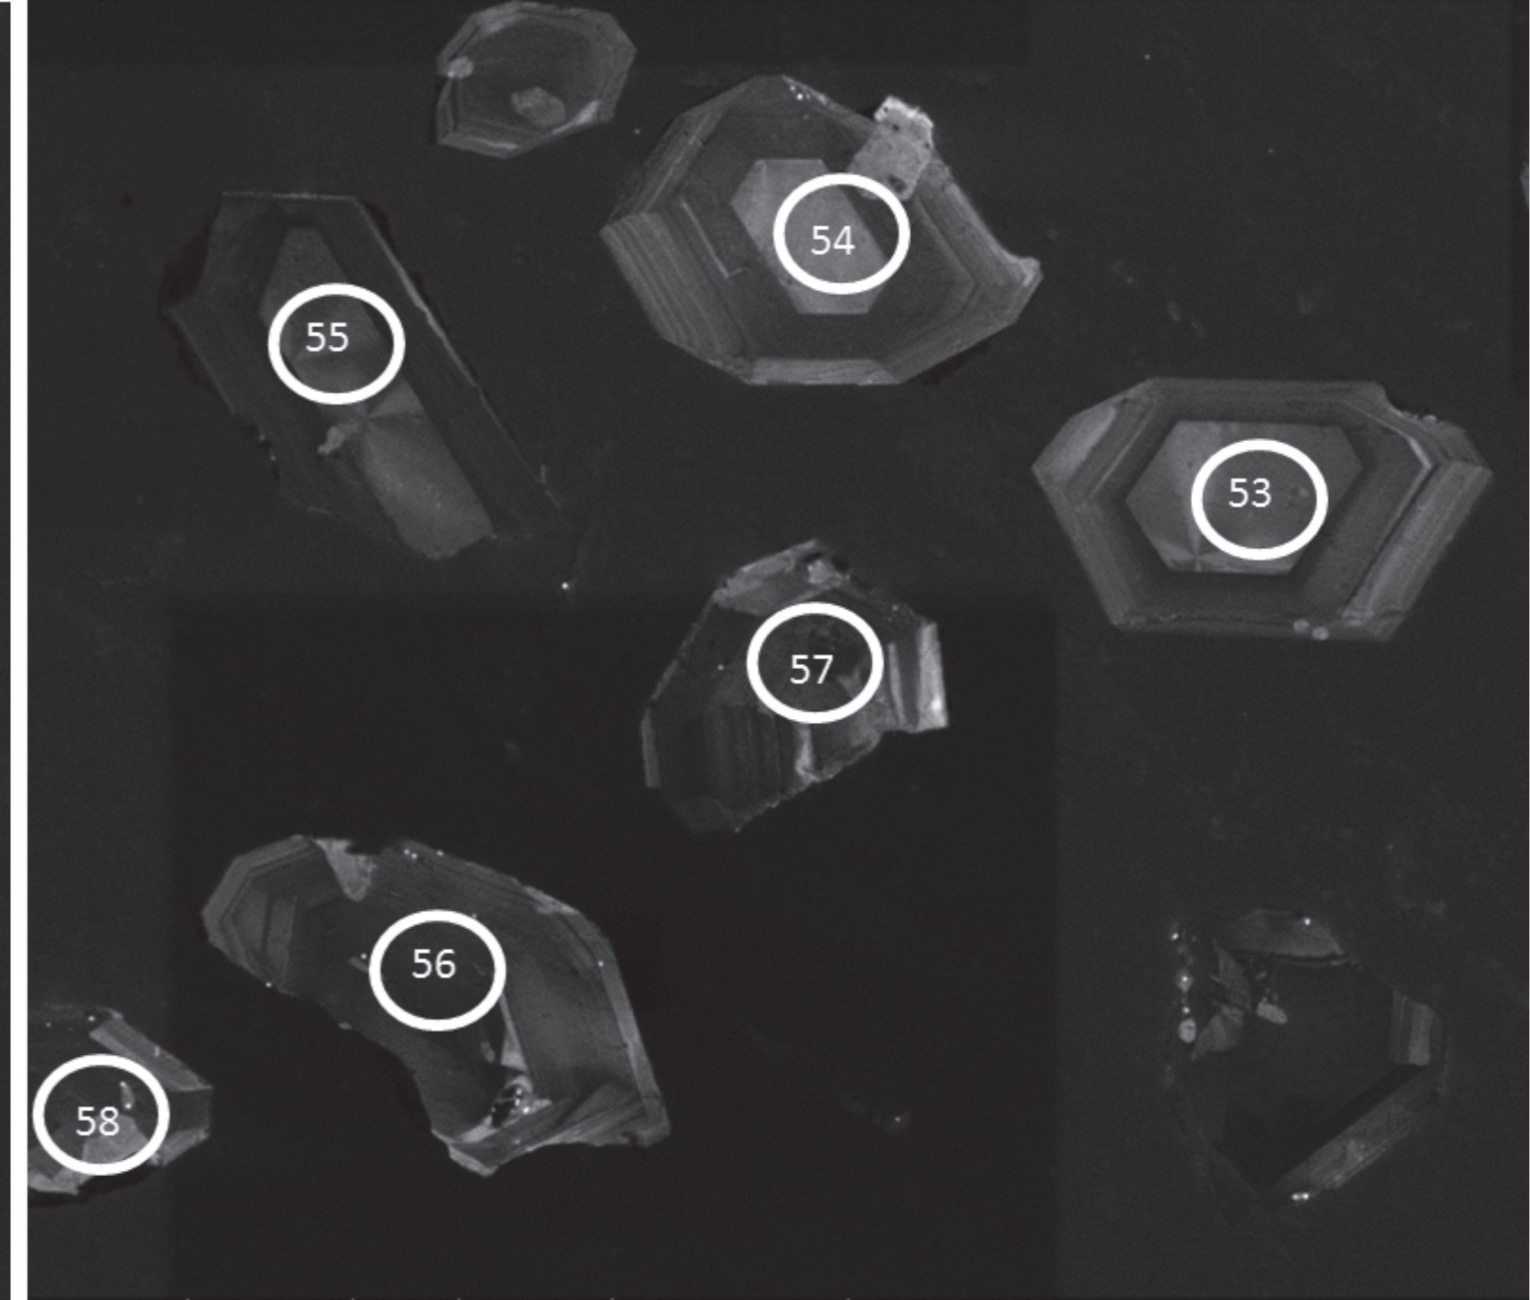

|                  |         |     |         |             |        |
|------------------|---------|-----|---------|-------------|--------|
| HV               | WD      | det | curr    | vac mode    | 200 μm |
| 10.00 kV         | 16.7 mm | PMD | 0.22 nA | High vacuum |        |
| McConnell 10-220 |         |     |         |             |        |
